# Supplementary material for: Excess TGF-β1 Drives Cardiac Mesenchymal Stromal Cells to a Pro-Fibrotic Commitment in Arrhythmogenic Cardiomyopathy
Source: MDPI journal article supplement (doi:10.3390/ijms22052673), 2021-03-06
Supplement: s1 [file s1]

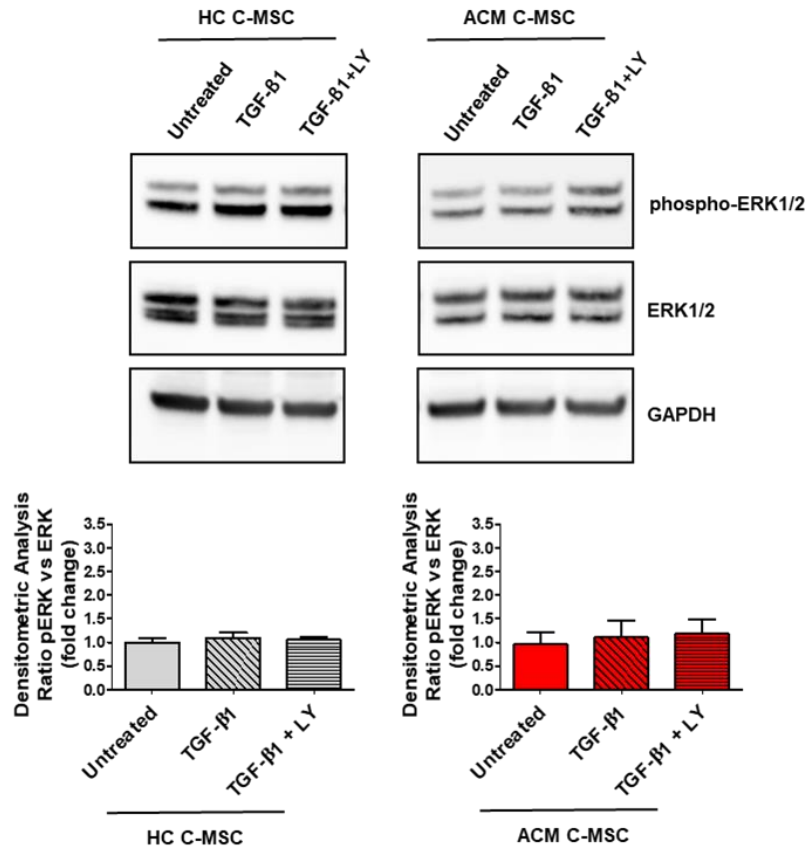

**Figure S1.** ACM C-MSC pro-fibrotic commitment does not involve ERK1/2 activation. Cardiac mesenchymal stromal cells isolated from HC donors and ACM patients were treated as described in Figure 6. Total protein extract from treated cells was subjected to Western blot analysis to visualize active phosphorylated form and total ERK using specific antibodies. Phospho-ERK1/2 levels were corrected by total ERK1/2 densitometry. Western blot data are presented as the fold change of target protein expression. The results are expressed as mean  $\pm$  SEM, (n= 3/group). One-way ANOVA and Bonferroni's post-test: no significant difference.

**Table S1.** Demographic characteristics of subjects enrolled for plasma test

|                     | ACM              | HC               | P value |
|---------------------|------------------|------------------|---------|
| Sex (% Male)        | 43/52 (82.69%)   | 45/52 (86.54%)   | 0.7866  |
| Age (mean $\pm$ SE) | 44.11 $\pm$ 1.94 | 42.09 $\pm$ 1.90 | 0.4583  |

**Table S2.** Clinical data of ACM patients enrolled for biopsy samples. Minor and major scores are given according to the International Task Force Criteria for the diagnosis of ACM [1]. VT: ventricular tachycardia; PVCs: premature ventricular contractions. Mutations are reported only when considered pathogenic or likely pathogenic.

|      | Sex/Age (at recruitment) | Age/Type of first manifestation | Dysfunction/ structural alterations at imaging | Tissue characterization | Repolarization abnormalities | Depolarization conduction abnormalities | Arrhythmias | Family history/ Genetics                               |
|------|--------------------------|---------------------------------|------------------------------------------------|-------------------------|------------------------------|-----------------------------------------|-------------|--------------------------------------------------------|
| ACM1 | M/ 52                    | 51/ VT                          | minor                                          | minor                   | minor                        | minor                                   | major       | major<br>( <i>PKP2</i> c.2013delC<br>p.Lys672ArgfsX12) |
| ACM2 | M/ 42                    | 42/VT                           | major                                          | not conclusive          | major                        | no                                      | major       | major<br>( <i>PKP2</i> c.1643delG<br>p.Gly548ValfsX15) |
| ACM3 | M/ 41                    | 27/PVCs                         | major                                          | not conclusive          | major                        | no                                      | minor       | major<br>( <i>PKP2</i> c.2013delC<br>p.Lys672ArgfsX12) |
| ACM4 | M/ 51                    | 51/VT                           | minor                                          | major                   | no                           | minor                                   | major       | no                                                     |

|       |       |                       |       |                |       |       |       |                                                  |
|-------|-------|-----------------------|-------|----------------|-------|-------|-------|--------------------------------------------------|
| ACM5  | F/ 24 | 24/VT                 | major | not conclusive | minor | no    | major | major<br>( <i>DSG2</i> c.1003A>G<br>p.Thr335Ala) |
| ACM6  | M/ 50 | 41/ECG<br>alterations | major | not conclusive | major | no    | minor | no                                               |
| ACM7  | M/ 47 | 35/PVCs               | minor | not conclusive | major | no    | minor | no                                               |
| ACM8  | M/ 46 | 45/syncope            | minor | not conclusive | minor | no    | no    | major                                            |
| ACM9  | M/ 43 | 43/VT                 | major | minor          | minor | minor | major | no                                               |
| ACM10 | F/ 52 | 50/PVCs               | major | major          | minor | minor | minor | no                                               |

**Table S3.** Clinical features of the deceased tissue donors (with healthy heart) enrolled in this study.

| <b>ID</b> | <b>Sex<br/>(M=male;<br/>F=female)</b> | <b>Age</b> | <b>Cause of death</b> | <b>Concomitant<br/>diseases</b> | <b>Drugs</b> | <b>Cardiovascular<br/>risk factors</b> |
|-----------|---------------------------------------|------------|-----------------------|---------------------------------|--------------|----------------------------------------|
| HC1       | M                                     | 51         | Cerebral hemorrhage   | /                               | /            | Hypertension                           |
| HC2       | M                                     | 41         | Multiple trauma       | /                               | /            | /                                      |
| HC3       | M                                     | 42         | Multiple trauma       | /                               | /            | /                                      |
| HC4       | F                                     | 48         | Cerebral hemorrhage   | /                               | /            | Hypertension                           |
| HC5       | F                                     | 18         | Multiple trauma       | /                               | /            | /                                      |

|      |   |    |                     |                                     |                                     |                          |
|------|---|----|---------------------|-------------------------------------|-------------------------------------|--------------------------|
| HC6  | M | 49 | Cerebral hemorrhage | /                                   | /                                   | /                        |
| HC7  | M | 55 | Cerebral hemorrhage | /                                   | /                                   | /                        |
| HC8  | M | 50 | Multiple trauma     | /                                   | /                                   | /                        |
| HC9  | M | 40 | Cerebral hemorrhage | /                                   | /                                   | Smoking,<br>Hypertension |
| HC10 | F | 50 | Respiratory failure | Idiopathic<br>pulmonary<br>fibrosis | Angiotensin<br>Receptor<br>Blockers | /                        |

**Table S4.** Primary antibodies

| <b>Protein</b> | <b>Clonality/Code</b>                    | <b>Source/Isotype</b> | <b>Company</b> | <b>Dilution</b>       |
|----------------|------------------------------------------|-----------------------|----------------|-----------------------|
| COL1A1         | Monoclonal, #84336                       | Rabbit                | Cell Signaling | WB: 1:1000; IF: 1:200 |
| CD44           | Monoclonal (Clone Hermes-1),<br>ab119335 | Rat                   | Abcam          | IF: 1:50              |
| $\alpha$ -SMA  | Monoclonal, A 2547                       | Mouse IgG2a           | Sigma-Aldrich  | WB: 1:1000; IF: 1:200 |
| TGF- $\beta$ 1 | Monoclonal [9016], ab64715               | Mouse IgG1            | Abcam          | WB: 1:1000            |

|                 |                               |            |                |                       |
|-----------------|-------------------------------|------------|----------------|-----------------------|
| phospho-SMAD2/3 | Monoclonal, D27F4             | Rabbit IgG | Cell Signaling | WB: 1:1000            |
| SMAD2/3         | Monoclonal, D7G7              | Rabbit IgG | Cell Signaling | WB: 1:1000; IF: 1:200 |
| phospho-ERK1/2  | Monoclonal, #4370             | Rabbit IgG | Cell Signaling | WB: 1:1000            |
| ERK1/2          | Polyclonal, #9102             | Rabbit     | Cell Signaling | WB: 1:1000            |
| GAPDH           | Polyclonal (FL-335), sc-25778 | Rabbit     | Santa Cruz     | WB 1:1000             |

**Table S5.** Primer sequences 5' - 3'.

| <b>Gene</b>   | <b>Forward primer</b>      | <b>Reverse primer</b>    |
|---------------|----------------------------|--------------------------|
| <i>COL1A1</i> | CCCCTGGAAAGAATGGAGATG      | TCCAAACCACTGAAACCTCTG    |
| <i>COL1A2</i> | TCTAGAAAGAACCCAGCTCGCACA   | TGCATCCTTGGTTAGGGTCAATCC |
| <i>COL3A1</i> | CCGCTAGAAACTGCAGAGACCTGAAA | ATCCTTGGTTAGGGTCAACCCAGT |
| <i>ACTA2</i>  | TACTGCTGAGCGTGAGATTG       | TTCTCAAGGGAGGATGAGGA     |

|              |                       |                       |
|--------------|-----------------------|-----------------------|
| <i>TGFB1</i> | AAGTGGACATCAACGGGTTC  | GTCCTTGCGGAAGTCAATGT  |
| <i>CTGF</i>  | ACCAATGACAACGCCTCC    | TTGGAGATTTTGGGAGTACGG |
| <i>GAPDH</i> | ATGTTTCGTCATGGGTGTGAA | GTCTTCTGGGTGGCAGTGAT  |

## References

1. Marcus, F.I.; McKenna, W.J.; Sherrill, D.; Basso, C.; Bauce, B.; Bluemke, D.A.; Calkins, H.; Corrado, D.; Cox, M.G.; Daubert, J.P., et al. Diagnosis of arrhythmogenic right ventricular cardiomyopathy/dysplasia: proposed modification of the task force criteria. *Circulation* 2010, 121, 1533-1541, doi:10.1161/CIRCULATIONAHA.108.840827.
